# Supplementary material for: Molecular drivers of insecticide resistance in the Sahelo-Sudanian populations of a major malaria vector Anopheles coluzzii
Source: Springer Nature journal article supplement (doi:10.1186/s12915-023-01610-5), 2023-05-24
Supplement: MOESM1 [file 12915_2023_1610_MOESM1_ESM.pdf]

## Additional file 1: Supplementary Figures

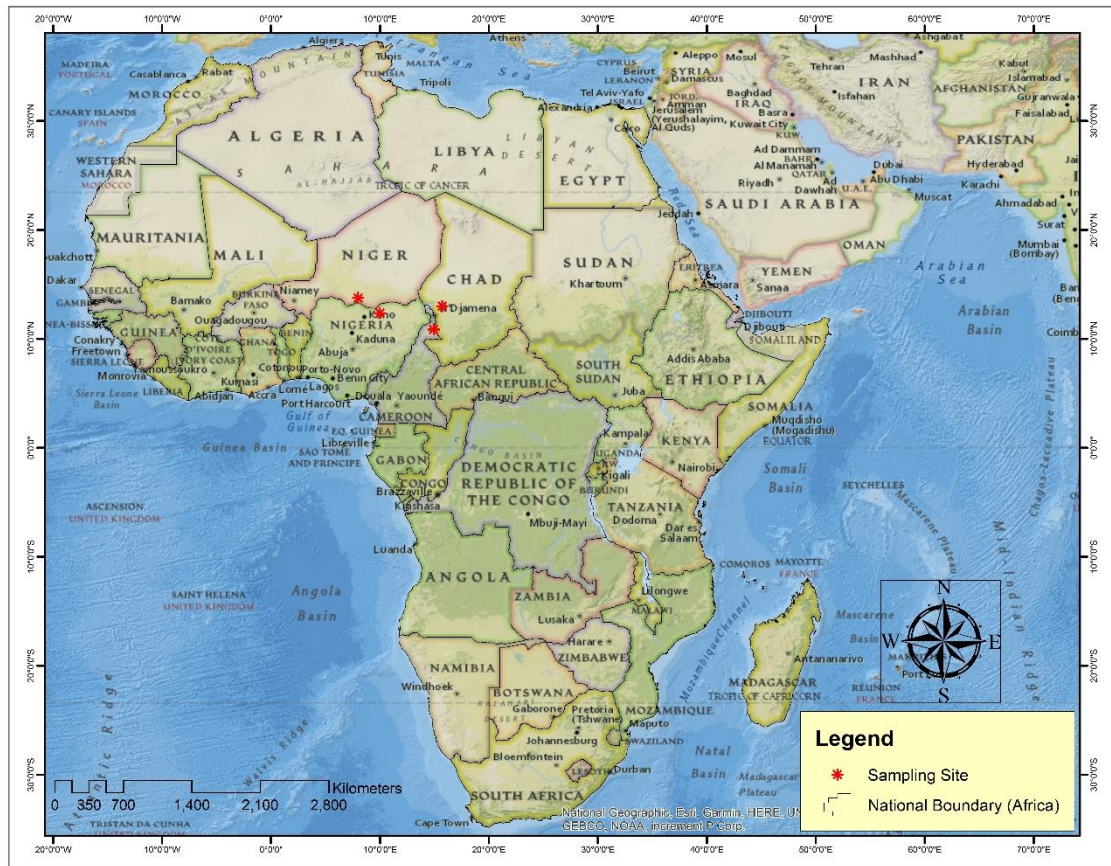

**Fig. S1: Sampling sites in the Sahel region of the four countries.**

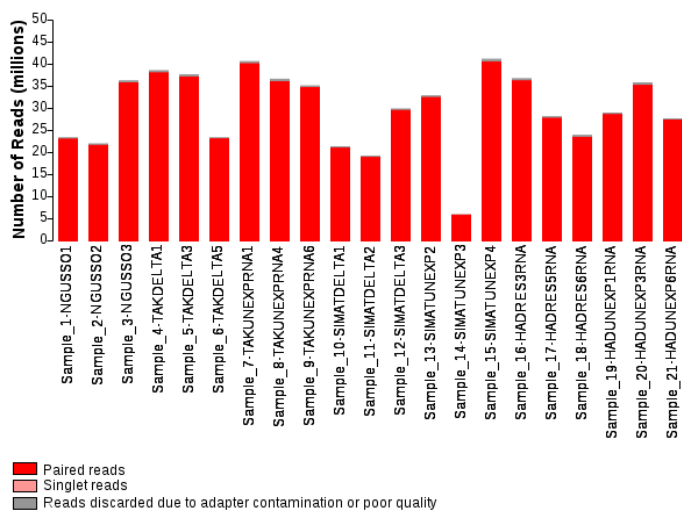

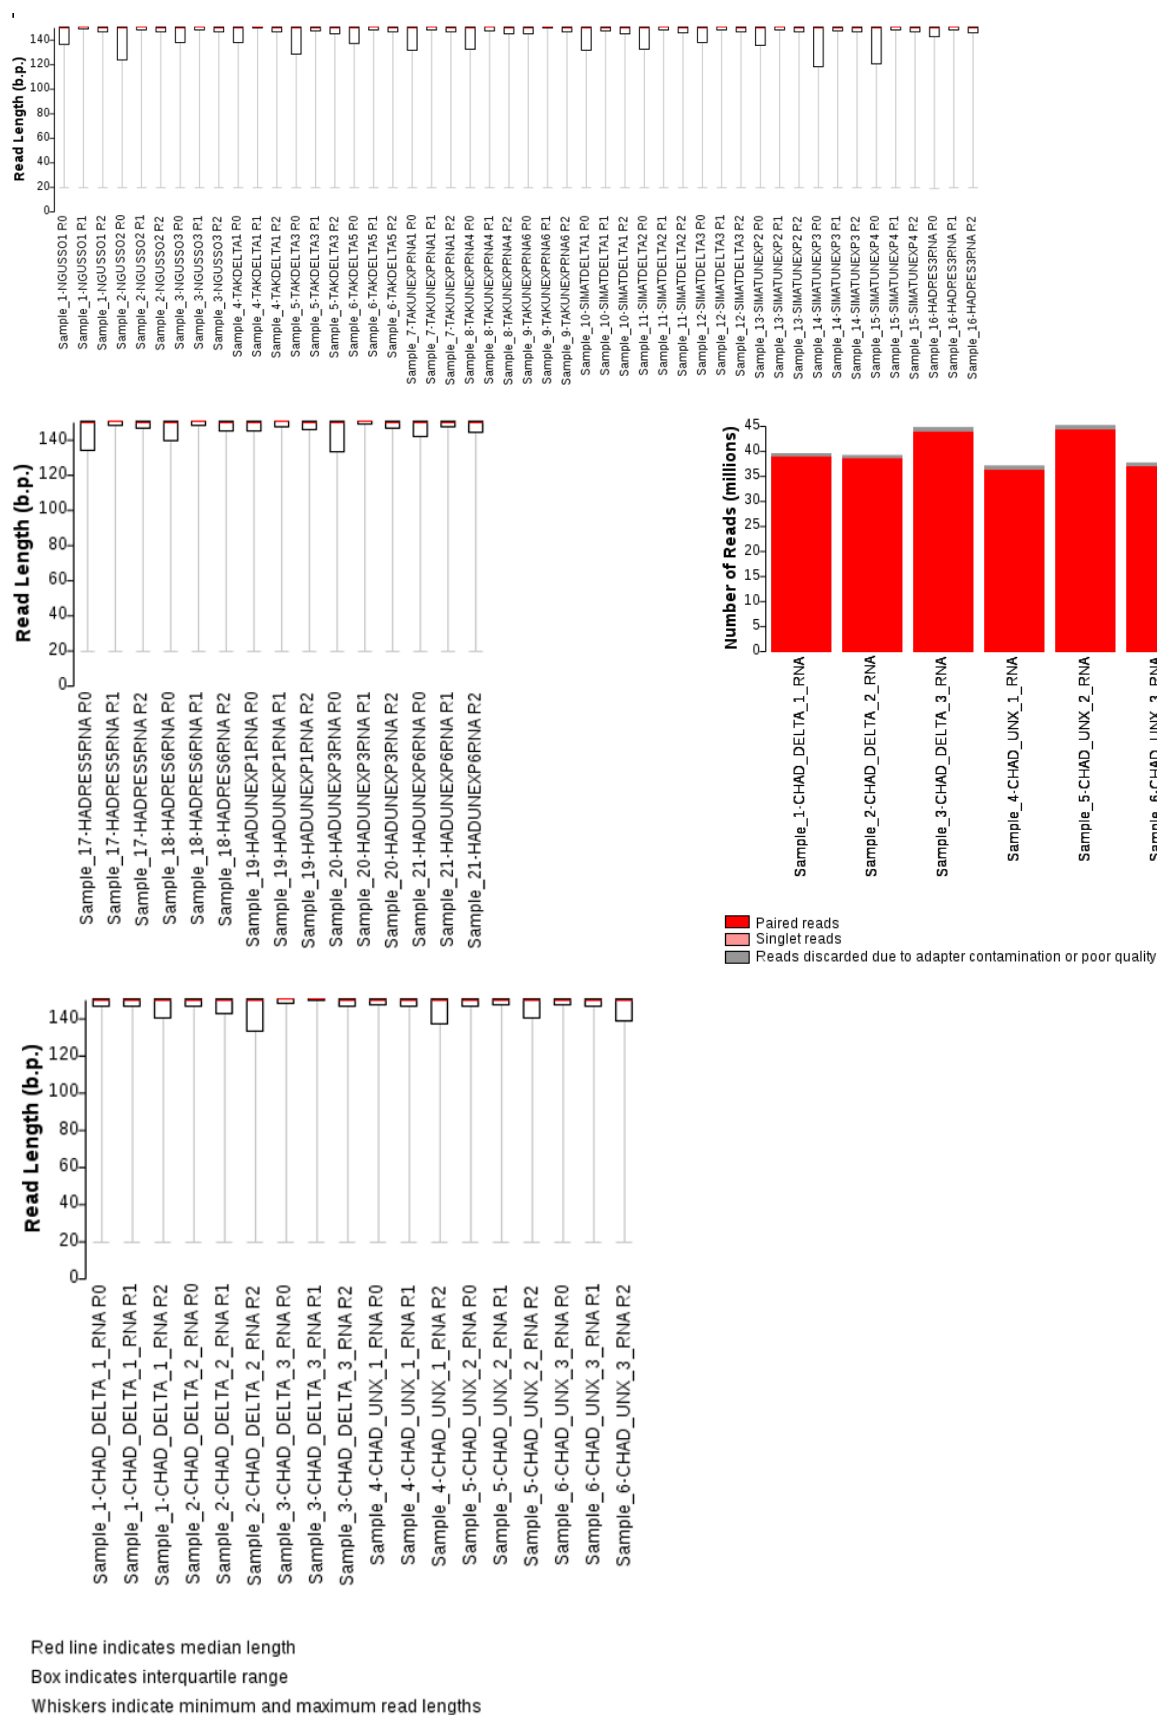

**Fig. S2: Summary of total number of reads for each sample and distribution of trimmed read length for forward (R1) and reverse (R2) reads and reads unpaired after trimming (R0).**

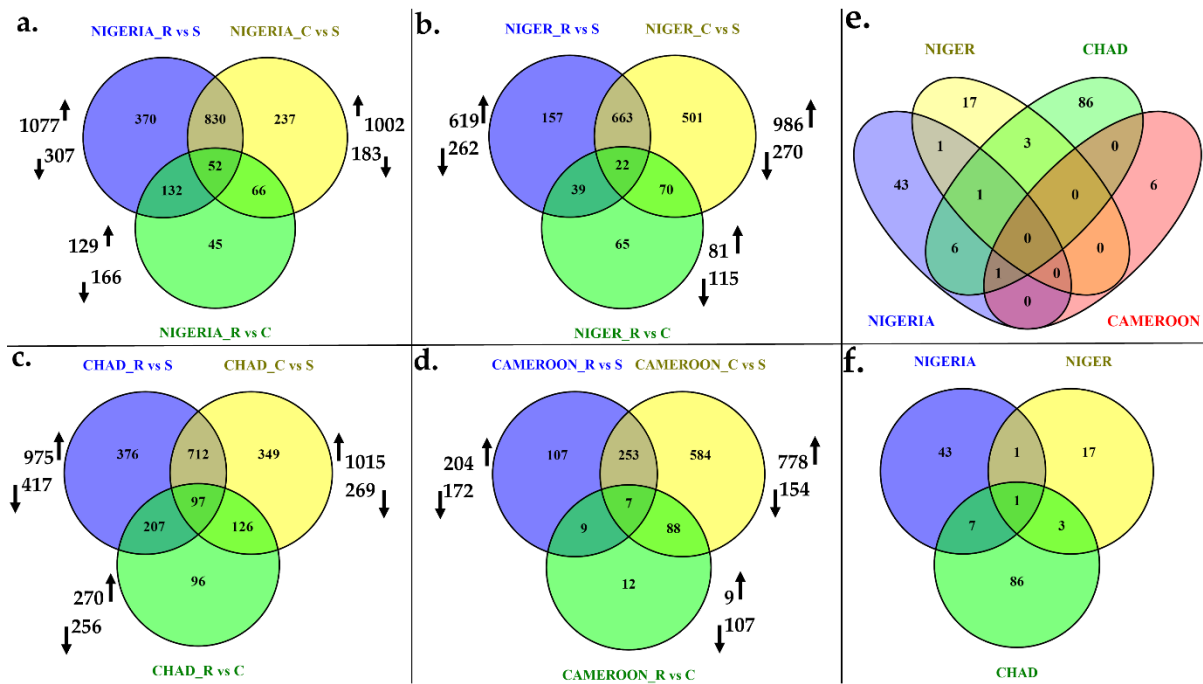

**Fig. S3: Venn diagrams comparing the summary the differentially expressed (DE) genes between resistant (R), unexposed (C) and susceptible (S) samples with a transcription ratio  $\log_2FC \geq 1$  in either direction, and a corrected p value  $< 0.05$ .**

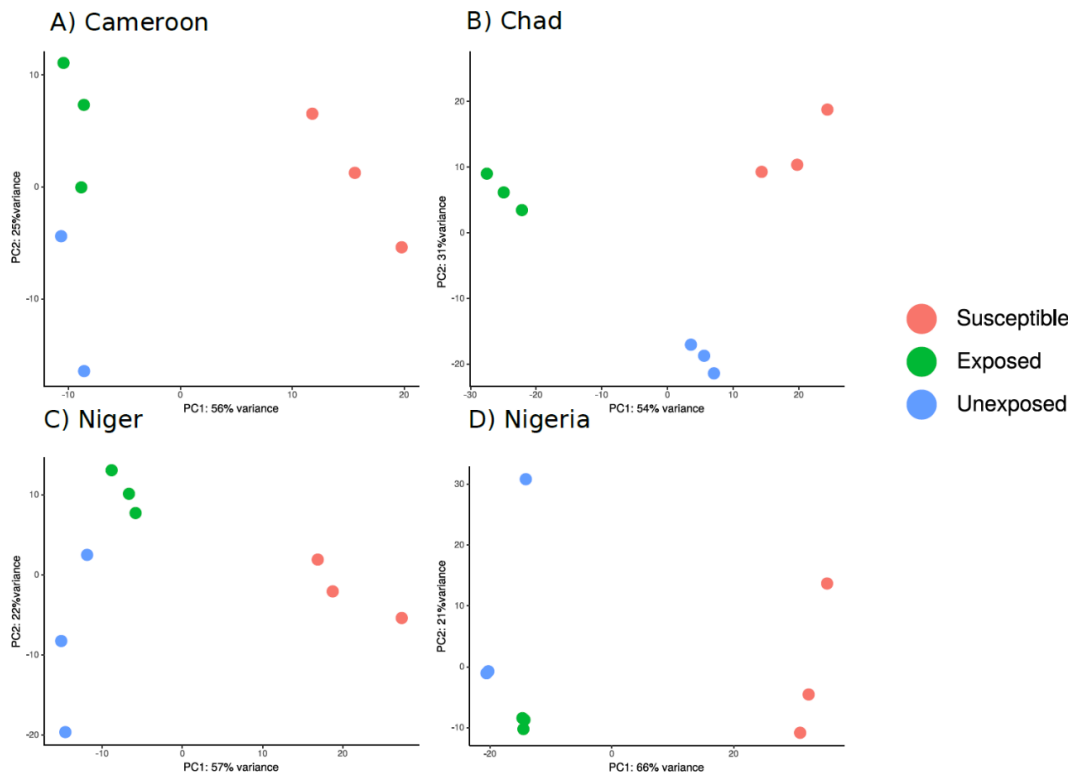

**Fig. S4: Principal component analysis of the 500 most variable genes from all RNAseq experimental arms in the data from the four countries.**

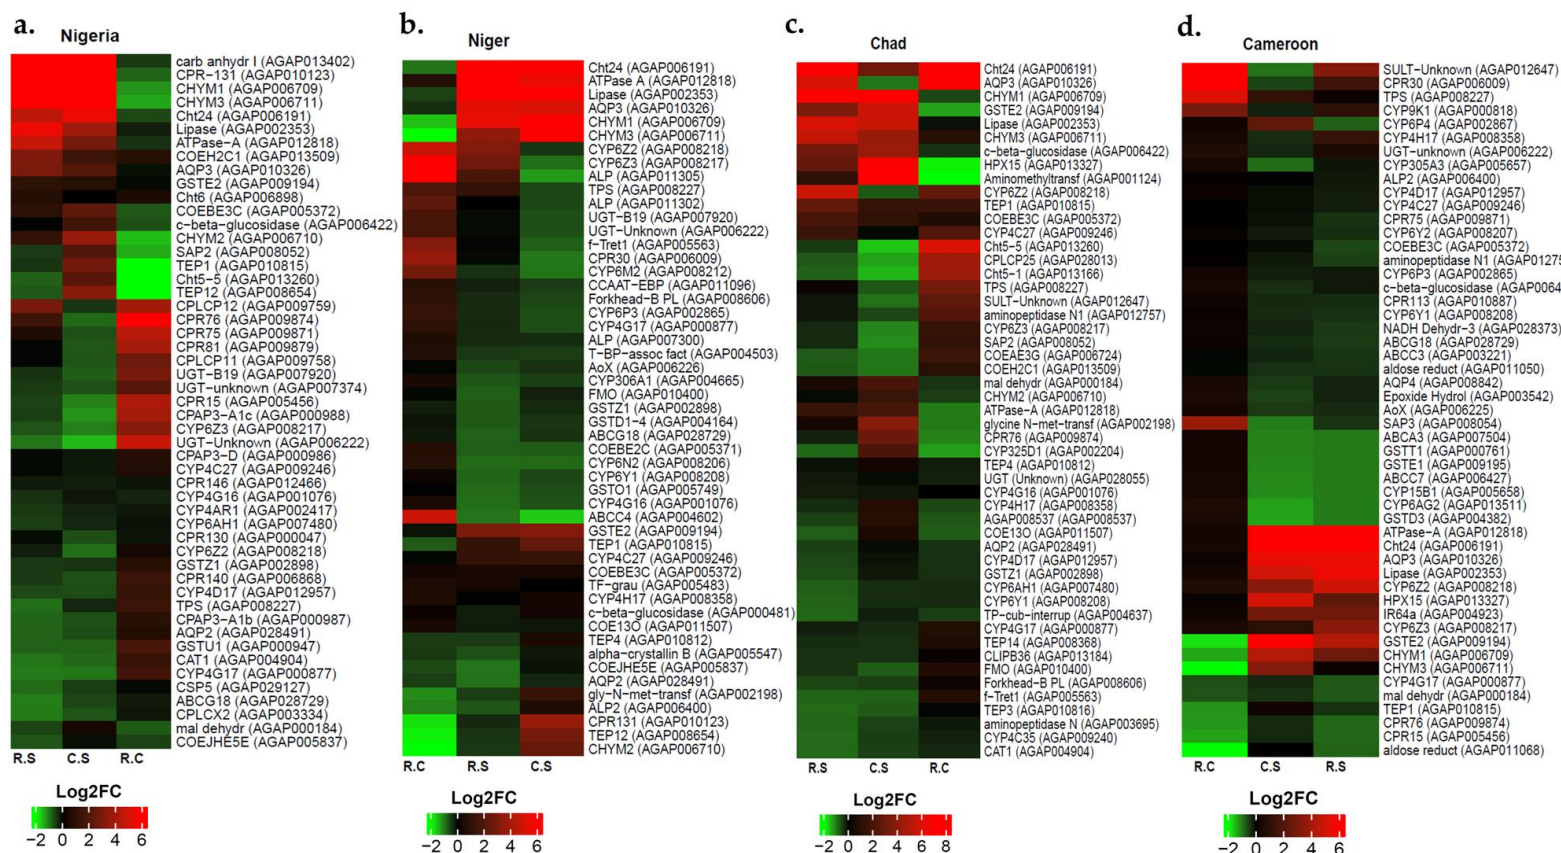

**Fig. S5: A heatmap showing the top 50 overexpressed genes in *An. coluzzii* populations from the Sahel region of each country. a. for Nigeria b., c. and d. for Niger, Chad and Cameroon. Several genes including chymotrypsins, CYP45Os, aquaporins, glutathione S-transferases and carboxylesterases are commonly upregulated across the Sahel of the four countries.**



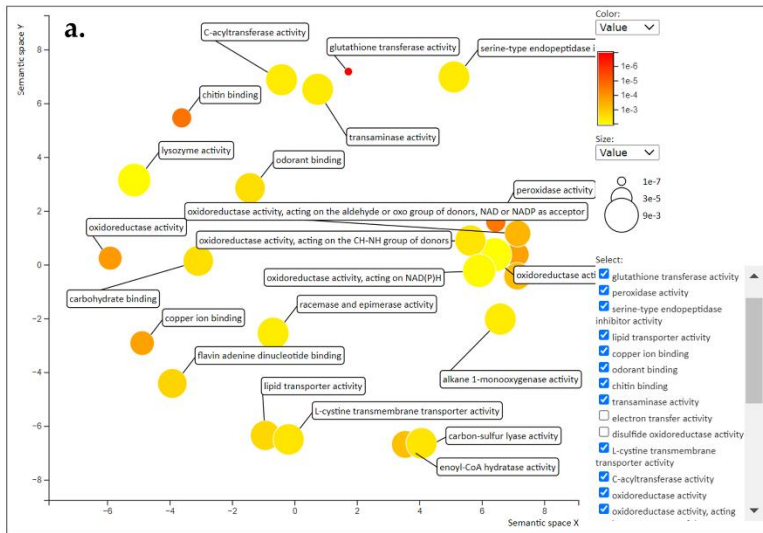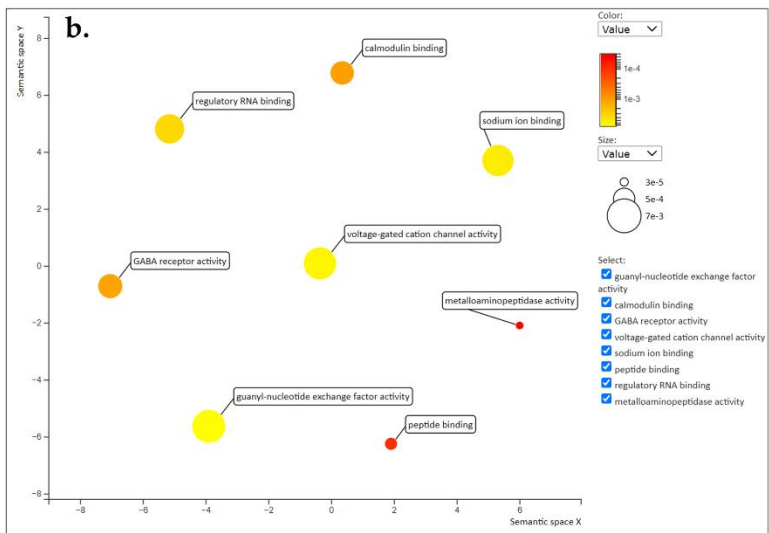

| Term ID    | Name                                                                                  | Frequency | Pin? | Value  | Uniqueness | Dispensability |
|------------|---------------------------------------------------------------------------------------|-----------|------|--------|------------|----------------|
| GO:0004867 | serine-type endopeptidase inhibitor activity                                          | 0.121%    |      | 0.0039 | 0.91       | 0.00           |
| GO:0015184 | L-cysteine transmembrane transporter activity                                         | 0.001%    |      | 0.0030 | 0.98       | 0.00           |
| GO:0016616 | oxidoreductase activity, acting on the CH-OH group of donors, NAD or NADP as acceptor | 1.855%    |      | 0.0095 | 0.80       | 0.00           |
| GO:0030246 | carbohydrate binding                                                                  | 0.797%    |      | 0.0023 | 0.98       | 0.00           |
| GO:0003796 | lyszyme activity                                                                      | 0.043%    |      | 0.0078 | 0.93       | 0.03           |
| GO:0016408 | C-acyltransferase activity                                                            | 0.080%    |      | 0.0040 | 0.95       | 0.03           |
| GO:0016846 | carbon-sulfur lyase activity                                                          | 0.134%    |      | 0.0030 | 0.94       | 0.03           |
| GO:0016854 | racemase and epimerase activity                                                       | 0.375%    |      | 0.0042 | 0.93       | 0.03           |
| GO:005549  | odorant binding                                                                       | 0.051%    |      | 0.0023 | 0.99       | 0.04           |
| GO:0003061 | chitin binding                                                                        | 0.116%    |      | 0.0000 | 0.98       | 0.05           |
| GO:0016491 | oxidoreductase activity                                                               | 12.887%   |      | 0.0001 | 0.95       | 0.05           |
| GO:0050660 | flavin adenine dinucleotide binding                                                   | 1.631%    |      | 0.0014 | 0.97       | 0.06           |
| GO:0005507 | copper ion binding                                                                    | 0.292%    |      | 0.0002 | 0.98       | 0.14           |
| GO:0003843 | transaminase activity                                                                 | 0.728%    |      | 0.0039 | 0.94       | 0.20           |
| GO:0004364 | glutathione transferase activity                                                      | 0.086%    |      | 0.0000 | 0.95       | 0.20           |
| GO:0016855 | alkane 1-monoxygenase activity                                                        | 0.001%    |      | 0.0040 | 0.98       | 0.23           |
| GO:0055319 | lipid transporter activity                                                            | 0.146%    |      | 0.0017 | 0.98       | 0.30           |
| GO:0015036 | disulfide oxidoreductase activity                                                     | 0.326%    |      | 0.0005 | 0.83       | 0.37           |
| GO:0016645 | oxidoreductase activity, acting on the CH-NH group of donors                          | 0.350%    |      | 0.0030 | 0.83       | 0.37           |
| GO:0004601 | peroxidase activity                                                                   | 0.427%    |      | 0.0000 | 0.77       | 0.38           |

| Term ID    | Name                                                      | Frequency | Pin? | Value  | Uniqueness | Dispensability |
|------------|-----------------------------------------------------------|-----------|------|--------|------------|----------------|
| GO:0005085 | guanylyl-nucleotide exchange factor activity              | 0.309%    |      | 0.0070 | 0.90       | 0.00           |
| GO:0016917 | GABA receptor activity                                    | 0.027%    |      | 0.0011 | 0.95       | 0.00           |
| GO:0022843 | voltage-gated cation channel activity                     | 0.155%    |      | 0.0060 | 0.43       | 0.00           |
| GO:0031402 | sodium ion binding                                        | 0.009%    |      | 0.0048 | 0.91       | 0.00           |
| GO:0070006 | metalloaminopeptidase activity                            | 0.153%    |      | 0.0000 | 1.00       | 0.00           |
| GO:0061980 | regulatory RNA binding                                    | 0.013%    |      | 0.0031 | 0.99       | 0.03           |
| GO:0005516 | calmodulin binding                                        | 0.135%    |      | 0.0009 | 0.99       | 0.03           |
| GO:0042277 | peptide binding                                           | 0.100%    |      | 0.0001 | 0.99       | 0.04           |
| GO:0008273 | calcium, potassium:sodium antiporter activity             | 0.006%    |      | 0.0048 | 0.49       | 0.47           |
| GO:0046961 | proton-transporting ATPase activity, rotational mechanism | 0.115%    |      | 0.0023 | 0.53       | 0.57           |
| GO:0099095 | ligand-gated anion channel activity                       | 0.006%    |      | 0.0008 | 0.49       | 0.64           |
| GO:0022848 | acetylcholine-gated cation-selective channel activity     | 0.024%    |      | 0.0000 | 0.43       | 0.70           |
| GO:0005323 | amino acid:sodium symporter activity                      | 0.045%    |      | 0.0001 | 0.45       | 0.72           |
| GO:0005328 | neurotransmitter:sodium symporter activity                | 0.001%    |      | 0.0000 | 0.58       | 0.73           |
| GO:0008028 | monocarboxylic acid transmembrane transporter activity    | 0.052%    |      | 0.0013 | 0.54       | 0.74           |
| GO:0022839 | ion gated channel activity                                | 0.054%    |      | 0.0000 | 0.53       | 0.74           |
| GO:0005254 | chloride channel activity                                 | 0.123%    |      | 0.0000 | 0.45       | 0.80           |
| GO:0005245 | voltage-gated calcium channel activity                    | 0.031%    |      | 0.0011 | 0.44       | 0.81           |
| GO:0015121 | amino acid transmembrane transporter activity             | 0.268%    |      | 0.0000 | 0.59       | 0.83           |
| GO:0030955 | sodium ion binding                                        | 0.068%    |      | 0.0048 | 0.91       | 0.86           |
| GO:0005096 | GTPase activator activity                                 | 0.247%    |      | 0.0003 | 0.90       | 0.87           |
| GO:0005249 | voltage-gated potassium channel activity                  | 0.119%    |      | 0.0022 | 0.41       | 0.90           |

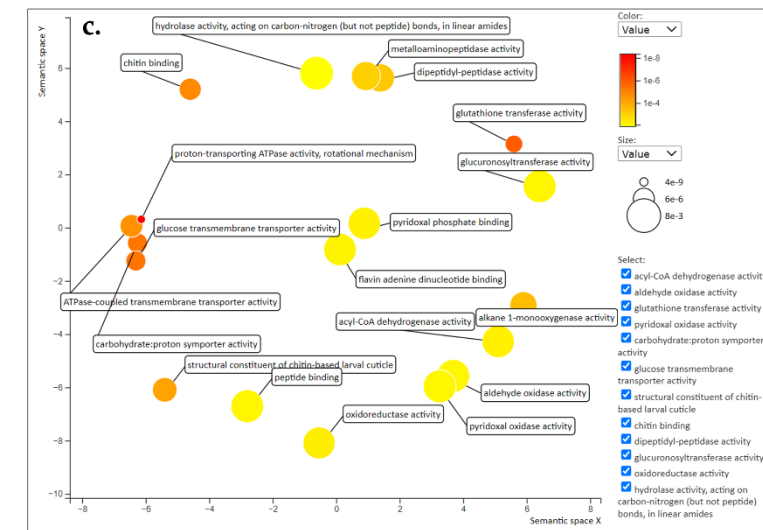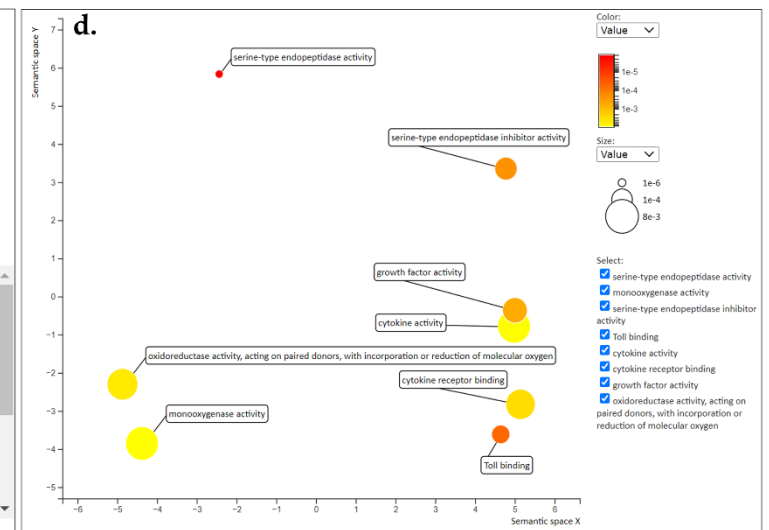

| Term ID    | Name                                                                                    | Frequency | Pin? | Value  | Uniqueness | Dispensability |
|------------|-----------------------------------------------------------------------------------------|-----------|------|--------|------------|----------------|
| GO:0008010 | structural constituent of chitin-based larval cuticle                                   | 0.002%    |      | 0.0000 | 1.00       | 0.00           |
| GO:0016811 | hydrolase activity, acting on carbon-nitrogen (but not peptide) bonds, in linear amides | 0.737%    |      | 0.0084 | 0.93       | 0.00           |
| GO:0042227 | peptide binding                                                                         | 0.100%    |      | 0.0051 | 0.98       | 0.00           |
| GO:0042626 | ATPase-coupled transmembrane transporter activity                                       | 1.389%    |      | 0.0000 | 0.83       | 0.00           |
| GO:0004732 | pyridoxal oxidase activity                                                              | 0.000%    |      | 0.0055 | 0.87       | 0.02           |
| GO:0015020 | glucuronosyltransferase activity                                                        | 0.043%    |      | 0.0051 | 0.96       | 0.03           |
| GO:0016491 | oxidoreductase activity                                                                 | 12.887%   |      | 0.0032 | 0.97       | 0.05           |
| GO:0050660 | flavin adenine dinucleotide binding                                                     | 1.631%    |      | 0.0044 | 0.96       | 0.05           |
| GO:0008061 | chitin binding                                                                          | 0.116%    |      | 0.0000 | 0.98       | 0.05           |
| GO:0004364 | glutathione transferase activity                                                        | 0.086%    |      | 0.0000 | 0.96       | 0.16           |
| GO:0003995 | acyl-CoA dehydrogenase activity                                                         | 0.152%    |      | 0.0039 | 0.92       | 0.16           |
| GO:0016855 | alkane 1-monoxygenase activity                                                          | 0.001%    |      | 0.0002 | 0.93       | 0.20           |
| GO:0070006 | metalloaminopeptidase activity                                                          | 0.153%    |      | 0.0006 | 0.89       | 0.23           |
| GO:0030178 | pyridoxal phosphate binding                                                             | 1.138%    |      | 0.0038 | 0.96       | 0.31           |
| GO:0005355 | glucose transmembrane transporter activity                                              | 0.012%    |      | 0.0000 | 0.86       | 0.33           |
| GO:0008239 | dipeptidyl-peptidase activity                                                           | 0.046%    |      | 0.0004 | 0.89       | 0.65           |
| GO:0005351 | carbohydrate:proton symporter activity                                                  | 0.026%    |      | 0.0000 | 0.80       | 0.71           |
| GO:0046961 | proton-transporting ATPase activity, rotational mechanism                               | 0.115%    |      | 0.0000 | 0.83       | 0.71           |
| GO:0004031 | aldehyde oxidase activity                                                               | 0.002%    |      | 0.0055 | 0.86       | 0.80           |

| Term ID | Name | Frequency | Pin? | Value | Uniqueness | Dispensability |
|---------|------|-----------|------|-------|------------|----------------|
|---------|------|-----------|------|-------|------------|----------------|

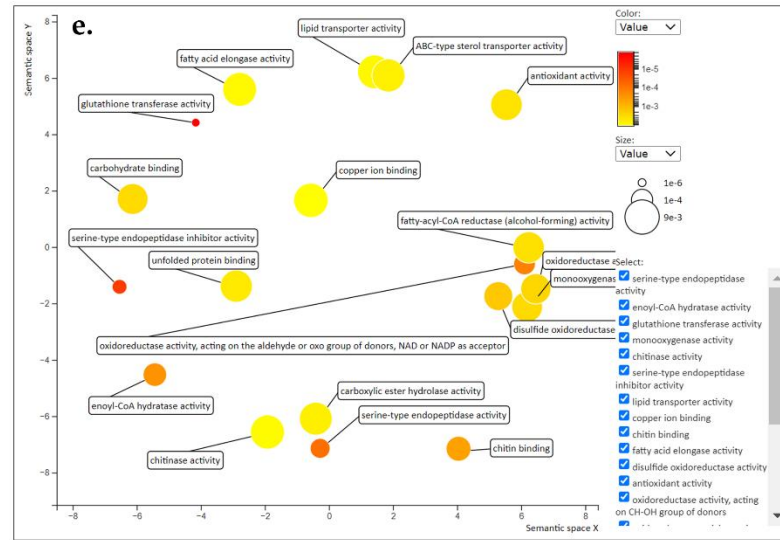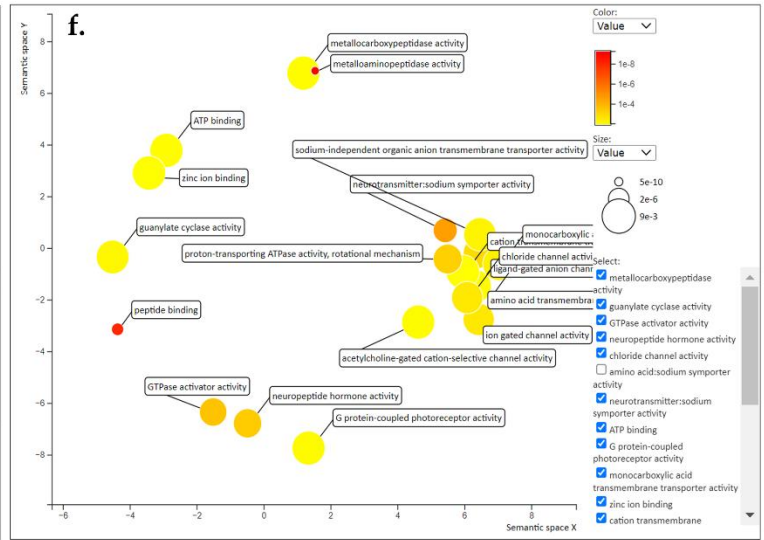

| Term ID    | Name                                                                                            | Frequency | Pin? | Value  | Uniqueness | Dispensability |
|------------|-------------------------------------------------------------------------------------------------|-----------|------|--------|------------|----------------|
| GO:0004568 | chitinase activity                                                                              | 0.057%    |      | 0.0084 | 0.93       | 0.00           |
| GO:0004967 | serine-type endopeptidase inhibitor activity                                                    | 0.121%    |      | 0.0000 | 1.00       | 0.00           |
| GO:0005319 | lipid transporter activity                                                                      | 0.146%    |      | 0.0076 | 0.94       | 0.00           |
| GO:0005507 | copper ion binding                                                                              | 0.292%    |      | 0.0093 | 0.99       | 0.00           |
| GO:0016209 | antioxidant activity                                                                            | 0.725%    |      | 0.0036 | 0.91       | 0.00           |
| GO:0004602 | peroxidase activity                                                                             | 0.427%    |      | 0.0008 | 0.73       | 0.91           |
| GO:0000019 | fatty-acyl-CoA reductase (alcohol-forming) activity                                             | 0.018%    |      | 0.0033 | 0.81       | 0.02           |
| GO:0009922 | fatty acid elongase activity                                                                    | 0.028%    |      | 0.0078 | 0.96       | 0.02           |
| GO:0004300 | enoyl-CoA hydratase activity                                                                    | 0.051%    |      | 0.0002 | 0.97       | 0.02           |
| GO:0003081 | chitin binding                                                                                  | 0.116%    |      | 0.0004 | 0.99       | 0.04           |
| GO:001092  | unfolded protein binding                                                                        | 0.424%    |      | 0.0045 | 0.90       | 0.05           |
| GO:0030246 | carbohydrate binding                                                                            | 0.797%    |      | 0.0027 | 0.98       | 0.05           |
| GO:0004364 | glutathione transferase activity                                                                | 0.086%    |      | 0.0000 | 0.96       | 0.16           |
| GO:0052689 | carboxylic ester hydrolase activity                                                             | 0.694%    |      | 0.0055 | 0.92       | 0.21           |
| GO:0004252 | serine-type endopeptidase activity                                                              | 0.893%    |      | 0.0001 | 0.92       | 0.27           |
| GO:0004497 | monooxygenase activity                                                                          | 1.211%    |      | 0.0026 | 0.80       | 0.27           |
| GO:0015026 | disulfide oxidoreductase activity                                                               | 0.326%    |      | 0.0014 | 0.82       | 0.35           |
| GO:0016614 | oxidoreductase activity, acting on CH-OH group of donors                                        | 2.116%    |      | 0.0023 | 0.79       | 0.43           |
| GO:0034041 | ABC-type sterol transporter activity                                                            | 0.000%    |      | 0.0058 | 0.94       | 0.57           |
| GO:0016620 | oxidoreductase activity, acting on the aldehyde or oxo group of donors, NAD or NADP as acceptor | 0.593%    |      | 0.0001 | 0.77       | 0.70           |

| Term ID    | Name                                                                | Frequency | Pin? | Value  | Uniqueness | Dispensability |
|------------|---------------------------------------------------------------------|-----------|------|--------|------------|----------------|
| GO:0004181 | metalcarboxypeptidase activity                                      | 0.086%    |      | 0.0081 | 0.90       | 0.00           |
| GO:0008270 | zinc ion binding                                                    | 3.639%    |      | 0.0092 | 0.96       | 0.00           |
| GO:0008324 | cation transmembrane transporter activity                           | 2.405%    |      | 0.0090 | 0.93       | 0.00           |
| GO:0008020 | G protein-coupled photoreceptor activity                            | 0.003%    |      | 0.0078 | 0.91       | 0.01           |
| GO:0042277 | peptide binding                                                     | 0.100%    |      | 0.0000 | 0.98       | 0.05           |
| GO:0043393 | guanylate cyclase activity                                          | 0.024%    |      | 0.0059 | 0.97       | 0.10           |
| GO:005184  | neuropeptide hormone activity                                       | 0.013%    |      | 0.0003 | 0.87       | 0.25           |
| GO:0055524 | ATP binding                                                         | 13.644%   |      | 0.0081 | 0.96       | 0.27           |
| GO:0055328 | neurotransmitter:sodium symporter activity                          | 0.001%    |      | 0.0000 | 0.63       | 0.43           |
| GO:0015347 | sodium-independent organic anion transmembrane transporter activity | 0.001%    |      | 0.0048 | 0.60       | 0.44           |
| GO:0050596 | GTPase activator activity                                           | 0.247%    |      | 0.0002 | 0.91       | 0.54           |
| GO:0022848 | acetylcholine-gated cation-selective channel activity               | 0.024%    |      | 0.0078 | 0.49       | 0.56           |
| GO:0008028 | monocarboxylic acid transmembrane transporter activity              | 0.052%    |      | 0.0042 | 0.54       | 0.57           |
| GO:0051554 | chloride channel activity                                           | 0.123%    |      | 0.0073 | 0.51       | 0.63           |
| GO:0046961 | proton-transporting ATPase activity, rotational mechanism           | 0.115%    |      | 0.0005 | 0.56       | 0.65           |
| GO:0022839 | ion gated channel activity                                          | 0.054%    |      | 0.0022 | 0.63       | 0.65           |
| GO:0055283 | amino acid:sodium symporter activity                                | 0.045%    |      | 0.0009 | 0.50       | 0.74           |
| GO:0099095 | ligand-gated anion channel activity                                 | 0.006%    |      | 0.0022 | 0.55       | 0.80           |
| GO:0070006 | metalcarboxypeptidase activity                                      | 0.153%    |      | 0.0000 | 0.90       | 0.83           |
| GO:0015171 | amino acid transmembrane transporter activity                       | 0.268%    |      | 0.0001 | 0.60       | 0.83           |

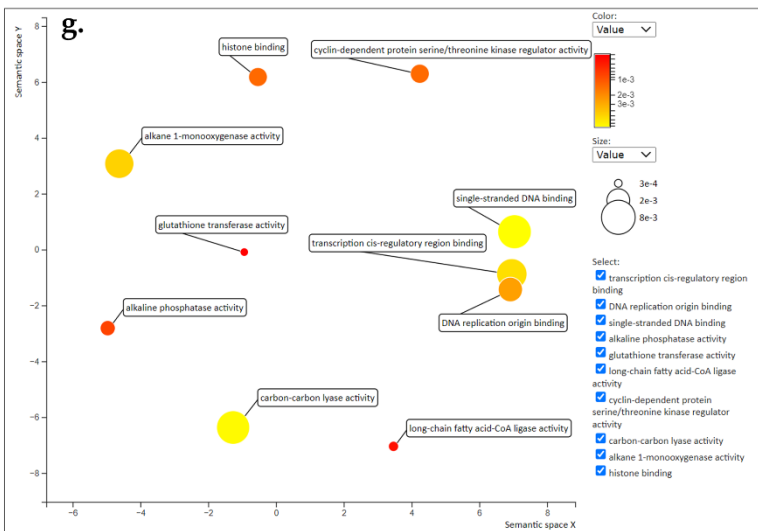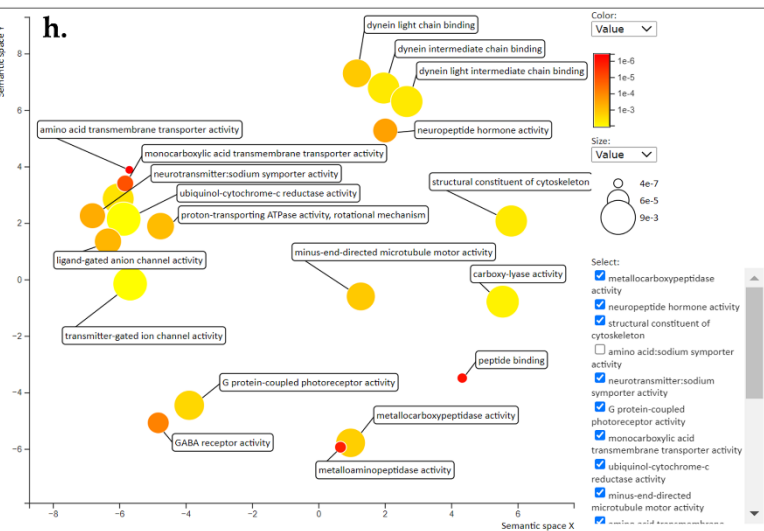

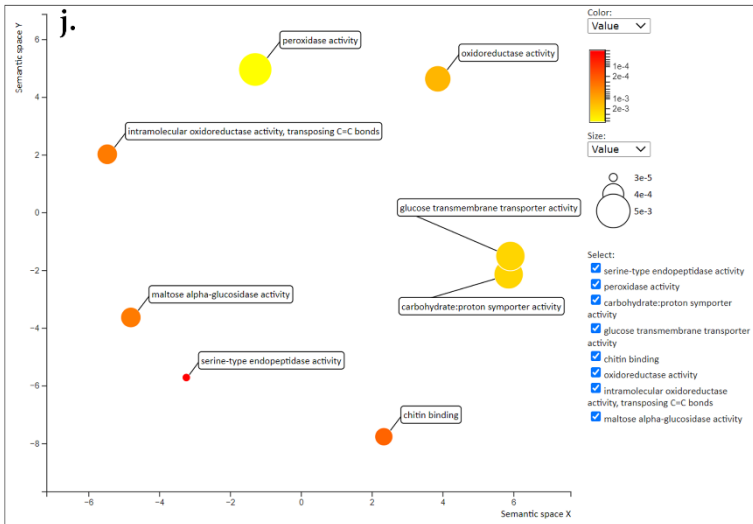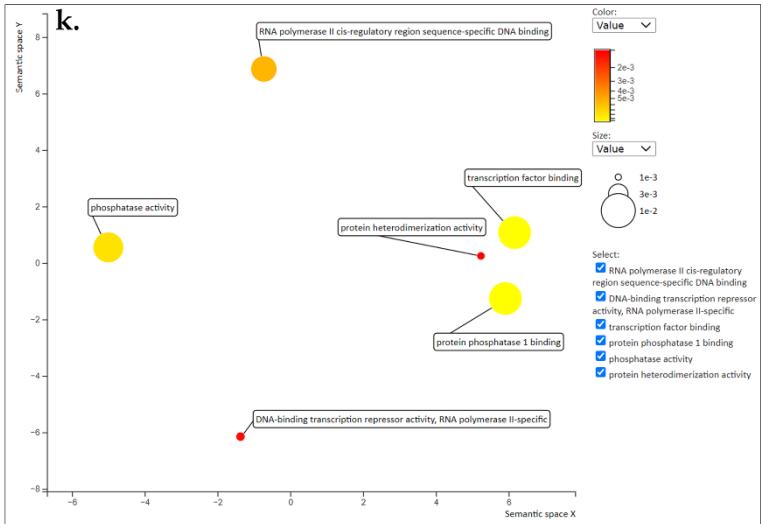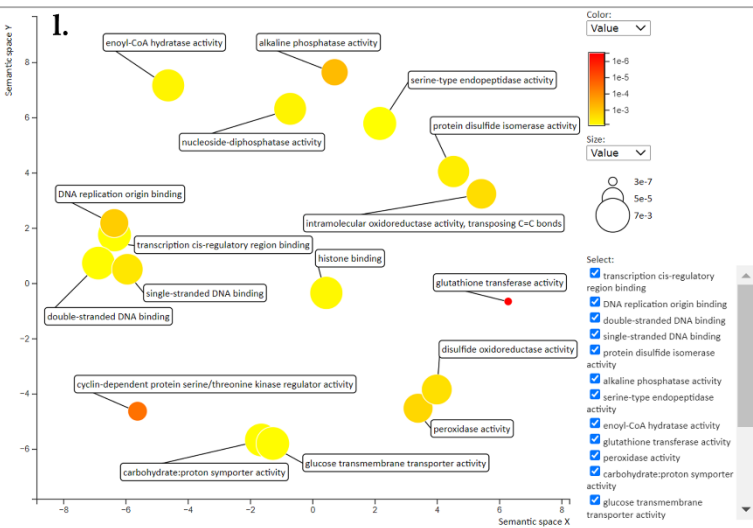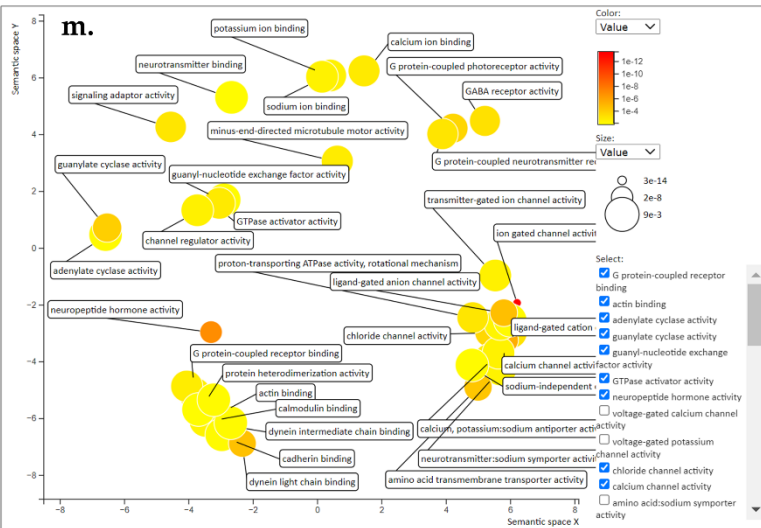



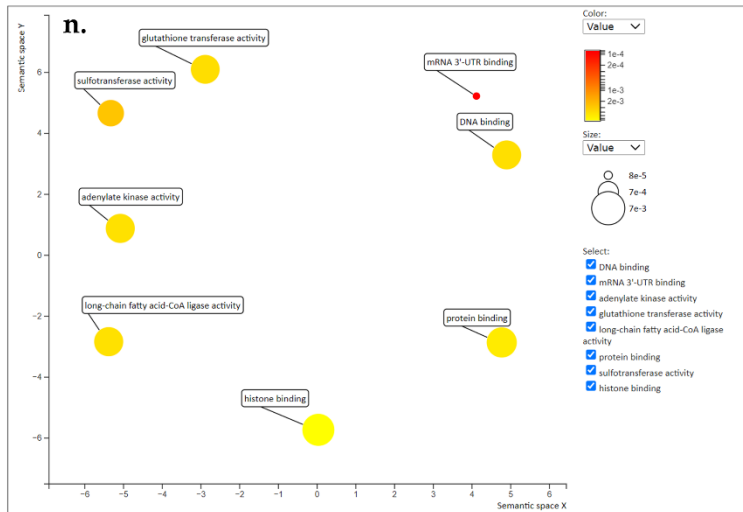

| Term ID    | Name                                      | Frequency | Pin?   | Value | Uniqueness | Dispensability |
|------------|-------------------------------------------|-----------|--------|-------|------------|----------------|
| GO:0004487 | long-chain fatty acid-CoA ligase activity | 0.034%    | 0.0039 | 0.93  | 0.00       |                |
| GO:0043393 | histone binding                           | 0.086%    | 0.0066 | 0.96  | 0.00       |                |
| GO:004364  | glutathione transferase activity          | 0.086%    | 0.0037 | 0.90  | 0.02       |                |
| GO:003730  | mRNA 3'-UTR binding                       | 0.026%    | 0.0001 | 0.91  | 0.04       |                |
| GO:0005515 | protein binding                           | 4.557%    | 0.0047 | 0.94  | 0.05       |                |
| GO:0005146 | sulfotransferase activity                 | 0.121%    | 0.0024 | 0.90  | 0.17       |                |
| GO:0004017 | adenylate kinase activity                 | 0.059%    | 0.0039 | 0.85  | 0.20       |                |
| GO:0003677 | DNA binding                               | 11.354%   | 0.0038 | 0.88  | 0.26       |                |

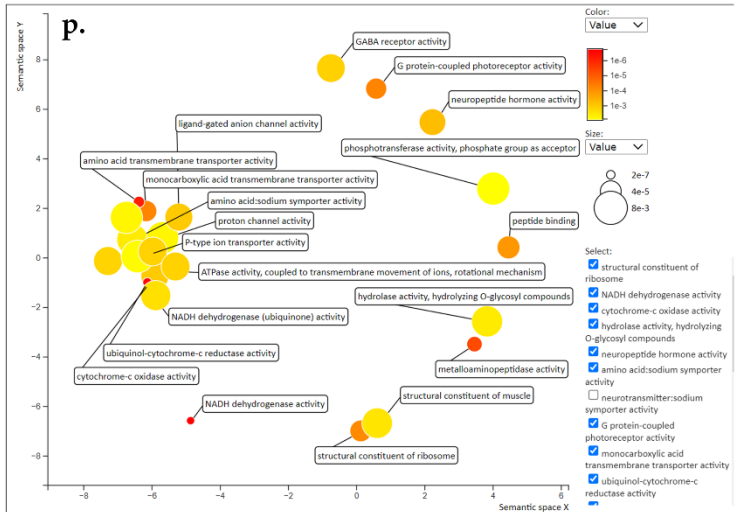

| Term ID    | Name                                                                             | Frequency | Pin?   | Value | Uniqueness | Dispensability |
|------------|----------------------------------------------------------------------------------|-----------|--------|-------|------------|----------------|
| GO:0003027 | structural constituent of muscle                                                 | 0.004%    | 0.0025 | 0.96  | 0.00       |                |
| GO:0015662 | P-type ion transporter activity                                                  | 0.107%    | 0.0065 | 0.46  | 0.00       |                |
| GO:0016776 | phosphotransferase activity, phosphate group as acceptor                         | 0.361%    | 0.0076 | 0.99  | 0.00       |                |
| GO:0016917 | GABA receptor activity                                                           | 0.027%    | 0.0011 | 0.96  | 0.00       |                |
| GO:0005184 | neuropeptide hormone activity                                                    | 0.013%    | 0.0005 | 0.97  | 0.01       |                |
| GO:0004553 | hydrolyase activity, hydrolyzing O-glycosyl compounds                            | 1.613%    | 0.0033 | 0.97  | 0.03       |                |
| GO:0043227 | peptide binding                                                                  | 0.100%    | 0.0001 | 1.00  | 0.03       |                |
| GO:0070006 | metallopeptidase activity                                                        | 0.153%    | 0.0000 | 0.97  | 0.24       |                |
| GO:0015217 | ADP transmembrane transporter activity                                           | 0.020%    | 0.0051 | 0.57  | 0.43       |                |
| GO:0008020 | G protein-coupled photoreceptor activity                                         | 0.003%    | 0.0000 | 0.93  | 0.46       |                |
| GO:0003735 | structural constituent of ribosome                                               | 2.348%    | 0.0001 | 0.96  | 0.50       |                |
| GO:0015252 | proton channel activity                                                          | 0.315%    | 0.0051 | 0.49  | 0.52       |                |
| GO:0009095 | ligand-gated anion channel activity                                              | 0.006%    | 0.0008 | 0.60  | 0.58       |                |
| GO:0005283 | amino acid:sodium symporter activity                                             | 0.045%    | 0.0034 | 0.44  | 0.61       |                |
| GO:0008137 | NADH dehydrogenase (ubiquinone) activity                                         | 0.260%    | 0.0021 | 0.45  | 0.61       |                |
| GO:0044769 | ATPase activity, coupled to transmembrane movement of ions, rotational mechanism | 0.115%    | 0.0012 | 0.52  | 0.62       |                |
| GO:0046961 | proton-transporting ATPase activity, rotational mechanism                        | 0.115%    | 0.0003 | 0.44  | 1.00       |                |

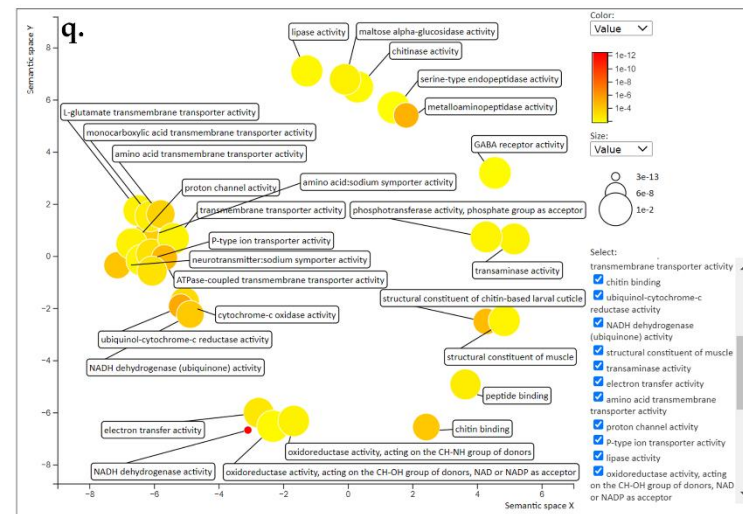

| Term ID    | Name                                                                                  | Frequency | Pin?   | Value | Uniqueness | Dispensability |
|------------|---------------------------------------------------------------------------------------|-----------|--------|-------|------------|----------------|
| GO:0004252 | serine-type endopeptidase activity                                                    | 0.893%    | 0.0096 | 0.90  | 0.00       |                |
| GO:0008307 | structural constituent of muscle                                                      | 0.004%    | 0.0039 | 0.98  | 0.00       |                |
| GO:0015662 | P-type ion transporter activity                                                       | 0.107%    | 0.0040 | 0.55  | 0.00       |                |
| GO:0016917 | GABA receptor activity                                                                | 0.027%    | 0.0073 | 1.00  | 0.00       |                |
| GO:0043227 | peptide binding                                                                       | 0.100%    | 0.0016 | 1.00  | 0.00       |                |
| GO:0016776 | phosphotransferase activity, phosphate group as acceptor                              | 0.361%    | 0.0037 | 0.96  | 0.03       |                |
| GO:0016616 | oxidoreductase activity, acting on the CH-OH group of donors, NAD or NADP as acceptor | 1.855%    | 0.0061 | 0.85  | 0.04       |                |
| GO:0008061 | chitin binding                                                                        | 0.116%    | 0.0001 | 1.00  | 0.04       |                |
| GO:0004568 | chitinase activity                                                                    | 0.057%    | 0.0058 | 0.92  | 0.21       |                |
| GO:0008483 | transaminase activity                                                                 | 0.728%    | 0.0036 | 0.96  | 0.23       |                |
| GO:0016298 | lipase activity                                                                       | 0.261%    | 0.0049 | 0.93  | 0.24       |                |
| GO:0008010 | structural constituent of chitin-based larval cuticle                                 | 0.002%    | 0.0000 | 0.98  | 0.33       |                |
| GO:0016643 | oxidoreductase activity, acting on the CH-NH group of donors                          | 0.350%    | 0.0028 | 0.86  | 0.37       |                |
| GO:0005311 | L-glutamate transmembrane transporter activity                                        | 0.004%    | 0.0028 | 0.65  | 0.39       |                |
| GO:0009035 | electron transfer activity                                                            | 1.194%    | 0.0011 | 0.77  | 0.42       |                |
| GO:0032450 | maltose alpha-glucosidase activity                                                    | 0.006%    | 0.0028 | 0.91  | 0.47       |                |
| GO:0005328 | neurotransmitter:sodium symporter activity                                            | 0.001%    | 0.0000 | 0.65  | 0.47       |                |
| GO:0015252 | proton channel activity                                                               | 0.315%    | 0.0028 | 0.57  | 0.52       |                |
| GO:0022852 | transmembrane transporter activity                                                    | 9.001%    | 0.0033 | 0.61  | 0.53       |                |
| GO:0070006 | metallopeptidase activity                                                             | 0.153%    | 0.0000 | 0.91  | 0.54       |                |

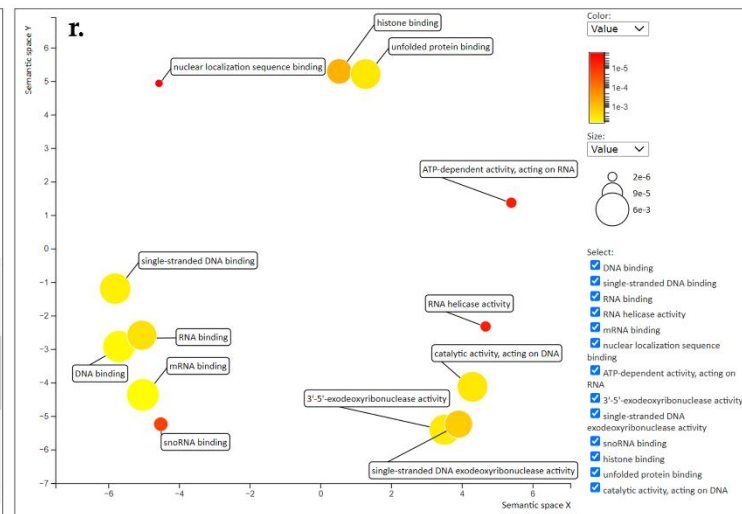

| Term ID    | Name                                     | Frequency | Pin?   | Value | Uniqueness | Dispensability |
|------------|------------------------------------------|-----------|--------|-------|------------|----------------|
| GO:0003228 | mRNA binding                             | 0.276%    | 0.0056 | 0.78  | 0.00       |                |
| GO:0009186 | ATP-dependent activity, acting on RNA    | 0.334%    | 0.0000 | 0.92  | 0.00       |                |
| GO:0140097 | catalytic activity, acting on DNA        | 2.626%    | 0.0028 | 0.79  | 0.00       |                |
| GO:0003139 | nuclear localization sequence binding    | 0.010%    | 0.0000 | 0.96  | 0.04       |                |
| GO:0015082 | unfolded protein binding                 | 0.424%    | 0.0028 | 0.87  | 0.05       |                |
| GO:003697  | single-stranded DNA binding              | 0.255%    | 0.0035 | 0.81  | 0.22       |                |
| GO:003677  | DNA binding                              | 11.354%   | 0.0048 | 0.75  | 0.33       |                |
| GO:0008296 | 3'-5'-exonuclease activity               | 0.010%    | 0.0031 | 0.78  | 0.39       |                |
| GO:0003015 | snRNA binding                            | 0.048%    | 0.0000 | 0.80  | 0.40       |                |
| GO:0043393 | histone binding                          | 0.086%    | 0.0005 | 0.88  | 0.47       |                |
| GO:0003723 | RNA binding                              | 5.630%    | 0.0023 | 0.76  | 0.53       |                |
| GO:0003724 | RNA helicase activity                    | 0.307%    | 0.0000 | 0.73  | 0.54       |                |
| GO:0008297 | single-stranded DNA exonuclease activity | 0.006%    | 0.0011 | 0.78  | 0.70       |                |



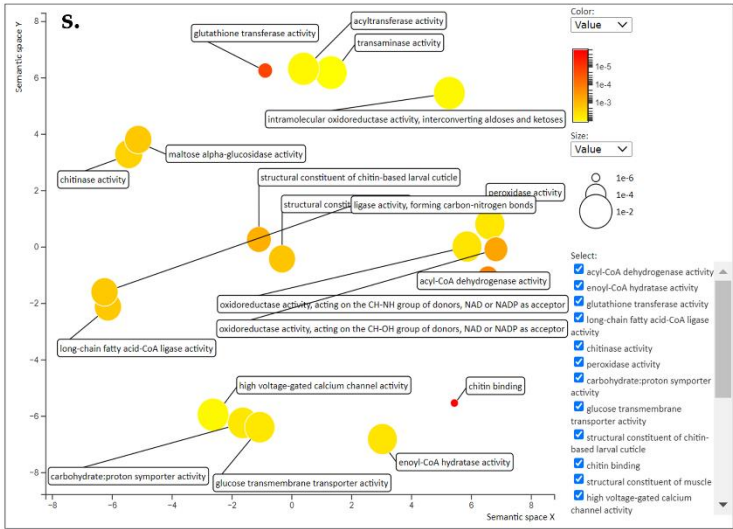

| Term ID    | Name                                                                                  | Frequency | Pin? | Value  | Uniqueness | Dispensability |
|------------|---------------------------------------------------------------------------------------|-----------|------|--------|------------|----------------|
| GO:0000561 | chitin binding                                                                        | 0.116%    |      | 0.0000 | 1.00       | 0.00           |
| GO:0003302 | structural constituent of muscle                                                      | 0.004%    |      | 0.0013 | 0.96       | 0.00           |
| GO:0008331 | high voltage-gated calcium channel activity                                           | 0.001%    |      | 0.0001 | 0.93       | 0.00           |
| GO:0008483 | transaminase activity                                                                 | 0.728%    |      | 0.0100 | 0.92       | 0.00           |
| GO:0004300 | enoyl-CoA hydratase activity                                                          | 0.051%    |      | 0.0039 | 0.97       | 0.03           |
| GO:0004568 | chitinase activity                                                                    | 0.057%    |      | 0.0020 | 0.92       | 0.03           |
| GO:0016561 | intramolecular oxidoreductase activity, interconverting aldoses and ketoses           | 0.309%    |      | 0.0001 | 0.96       | 0.03           |
| GO:0004601 | peroxidase activity                                                                   | 0.427%    |      | 0.0042 | 0.86       | 0.03           |
| GO:0016872 | ligase activity, forming carbon-nitrogen bonds                                        | 1.271%    |      | 0.0015 | 0.90       | 0.04           |
| GO:0004364 | glutathione transferase activity                                                      | 0.086%    |      | 0.0000 | 0.93       | 0.20           |
| GO:0005323 | glucose transmembrane transporter activity                                            | 0.012%    |      | 0.0044 | 0.90       | 0.22           |
| GO:0016746 | acyltransferase activity                                                              | 3.062%    |      | 0.0079 | 0.91       | 0.29           |
| GO:0003955 | acyl-CoA dehydrogenase activity                                                       | 0.152%    |      | 0.0001 | 0.87       | 0.30           |
| GO:0016646 | oxidoreductase activity, acting on the CH-NH group of donors, NAD or NADP as acceptor | 0.269%    |      | 0.0039 | 0.87       | 0.31           |
| GO:0008010 | structural constituent of chitin-based larval cuticle                                 | 0.002%    |      | 0.0006 | 0.96       | 0.33           |
| GO:0016616 | oxidoreductase activity, acting on the CH-OH group of donors, NAD or NADP as acceptor | 1.855%    |      | 0.0004 | 0.85       | 0.38           |

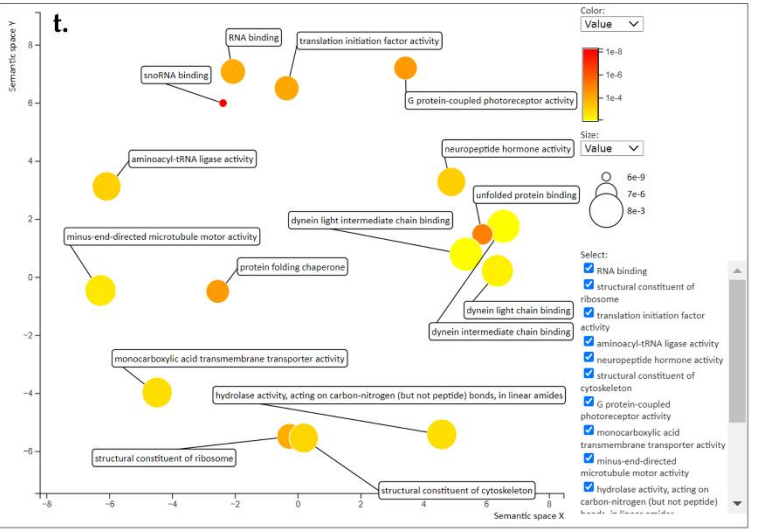

| Term ID    | Name                                                                                     | Frequency | Pin? | Value  | Uniqueness | Dispensability |
|------------|------------------------------------------------------------------------------------------|-----------|------|--------|------------|----------------|
| GO:0008028 | monooxygenase activity                                                                   | 0.052%    |      | 0.0014 | 1.00       | 0.00           |
| GO:0005669 | minus-end-directed microtubule motor activity                                            | 0.049%    |      | 0.0023 | 1.00       | 0.00           |
| GO:0016811 | hydrolyase activity, acting on carbon-nitrogen (but not peptide) bonds, in linear amides | 0.737%    |      | 0.0014 | 1.00       | 0.00           |
| GO:0051939 | dynein light intermediate chain binding                                                  | 0.026%    |      | 0.0080 | 0.80       | 0.00           |
| GO:0044183 | protein folding chaperone                                                                | 0.019%    |      | 0.0000 | 1.00       | 0.01           |
| GO:0005200 | structural constituent of cytoskeleton                                                   | 0.076%    |      | 0.0008 | 0.91       | 0.01           |
| GO:0004612 | aminoacyl-tRNA ligase activity                                                           | 0.895%    |      | 0.0006 | 1.00       | 0.03           |
| GO:0003743 | translation initiation factor activity                                                   | 0.394%    |      | 0.0001 | 0.84       | 0.04           |
| GO:0008020 | G protein-coupled photoreceptor activity                                                 | 0.003%    |      | 0.0000 | 0.94       | 0.16           |
| GO:0045503 | dynein light chain binding                                                               | 0.003%    |      | 0.0037 | 0.82       | 0.31           |
| GO:0001233 | RNA binding                                                                              | 5.630%    |      | 0.0001 | 0.89       | 0.32           |
| GO:0005184 | neurotrophin receptor activity                                                           | 0.013%    |      | 0.0006 | 0.76       | 0.34           |
| GO:0045505 | dynein intermediate chain binding                                                        | 0.030%    |      | 0.0080 | 0.80       | 0.36           |
| GO:0030515 | snoRNA binding                                                                           | 0.048%    |      | 0.0000 | 0.89       | 0.41           |
| GO:0051082 | unfolded protein binding                                                                 | 0.424%    |      | 0.0000 | 0.77       | 0.43           |
| GO:0003735 | structural constituent of ribosome                                                       | 2.348%    |      | 0.0001 | 0.92       | 0.63           |

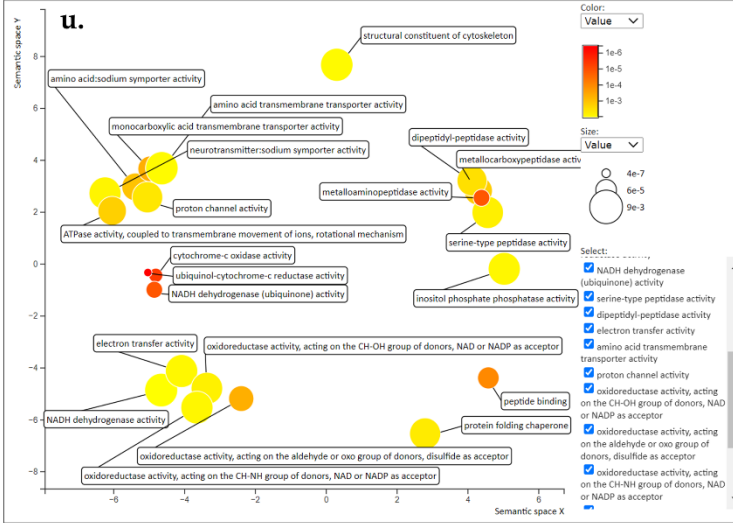

| Term ID    | Name                                                                                          | Frequency | Pin? | Value  | Uniqueness | Dispensability |
|------------|-----------------------------------------------------------------------------------------------|-----------|------|--------|------------|----------------|
| GO:0003954 | NADH dehydrogenase activity                                                                   | 0.374%    |      | 0.0094 | 0.76       | 0.00           |
| GO:0015171 | amino acid transmembrane transporter activity                                                 | 0.268%    |      | 0.0079 | 0.68       | 0.00           |
| GO:0004272 | peptide binding                                                                               | 0.100%    |      | 0.0001 | 1.00       | 0.00           |
| GO:0044183 | protein folding chaperone                                                                     | 0.019%    |      | 0.0043 | 0.99       | 0.01           |
| GO:0005200 | structural constituent of cytoskeleton                                                        | 0.076%    |      | 0.0076 | 0.99       | 0.01           |
| GO:0052745 | inositol phosphate phosphatase activity                                                       | 0.046%    |      | 0.0067 | 0.89       | 0.02           |
| GO:0008236 | serine-type peptidase activity                                                                | 1.328%    |      | 0.0051 | 0.75       | 0.21           |
| GO:0004332 | serine-type aminopeptidase activity                                                           | 0.893%    |      | 0.0001 | 0.76       | 0.94           |
| GO:0005328 | neurotransmitter:sodium symporter activity                                                    | 0.001%    |      | 0.0064 | 0.69       | 0.25           |
| GO:0016624 | oxidoreductase activity, acting on the aldehyde or oxo group of donors, disulfide as acceptor | 0.123%    |      | 0.0004 | 0.82       | 0.29           |
| GO:0016646 | oxidoreductase activity, acting on the CH-NH group of donors, NAD or NADP as acceptor         | 0.269%    |      | 0.0067 | 0.81       | 0.31           |
| GO:0005055 | electron transfer activity                                                                    | 1.194%    |      | 0.0071 | 0.69       | 0.36           |
| GO:0044769 | ATPase activity, coupled to transmembrane movement of ions, rotational mechanism              | 0.115%    |      | 0.0015 | 0.64       | 0.37           |
| GO:0005245 | proton-transporting ATPase activity, rotational mechanism                                     | 0.115%    |      | 0.0001 | 0.57       | 1.00           |
| GO:0016616 | oxidoreductase activity, acting on the CH-OH group of donors, NAD or NADP as acceptor         | 1.855%    |      | 0.0053 | 0.70       | 0.42           |

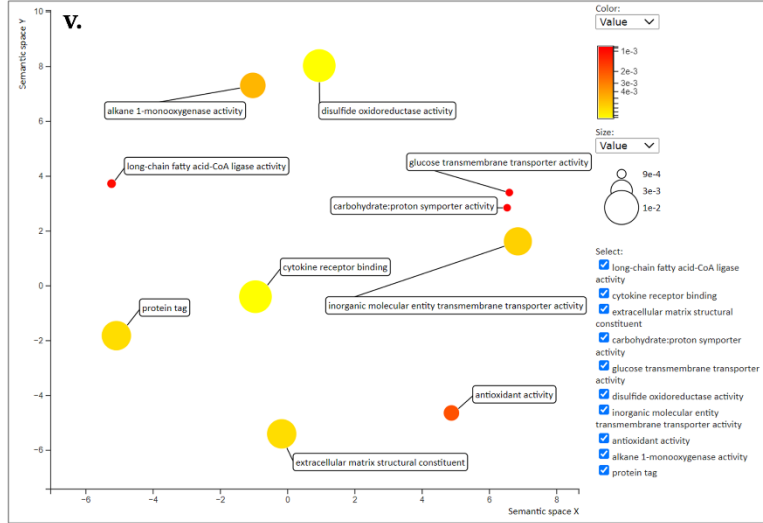

| Term ID    | Name                                                          | Frequency | Pin? | Value  | Uniqueness | Dispensability |
|------------|---------------------------------------------------------------|-----------|------|--------|------------|----------------|
| GO:0005126 | cytokine receptor binding                                     | 0.094%    |      | 0.0096 | 1.00       | 0.00           |
| GO:0005201 | extracellular matrix structural constituent                   | 0.037%    |      | 0.0070 | 1.00       | 0.00           |
| GO:0015316 | disulfide oxidoreductase activity                             | 0.326%    |      | 0.0096 | 0.95       | 0.00           |
| GO:0015318 | inorganic molecular entity transmembrane transporter activity | 2.924%    |      | 0.0062 | 0.84       | 0.00           |
| GO:0031386 | protein tag                                                   | 0.011%    |      | 0.0070 | 1.00       | 0.00           |
| GO:0016209 | antioxidant activity                                          | 0.725%    |      | 0.0019 | 0.99       | 0.01           |
| GO:0004467 | long-chain fatty acid-CoA ligase activity                     | 0.034%    |      | 0.0010 | 0.98       | 0.02           |
| GO:0018685 | alkane 1-monooxygenase activity                               | 0.001%    |      | 0.0048 | 0.95       | 0.21           |
| GO:0005355 | glucose transmembrane transporter activity                    | 0.012%    |      | 0.0009 | 0.70       | 0.35           |
| GO:0005351 | carbohydrate:proton symporter activity                        | 0.026%    |      | 0.0009 | 0.77       | 0.71           |

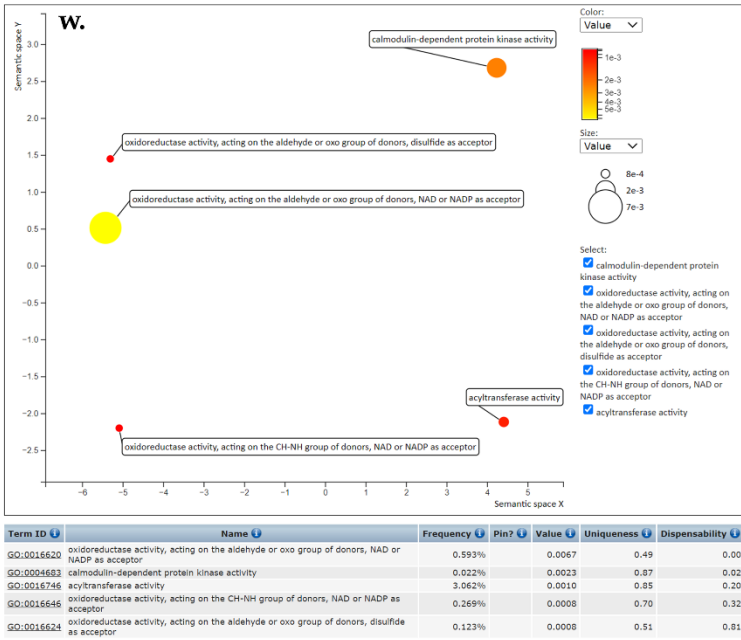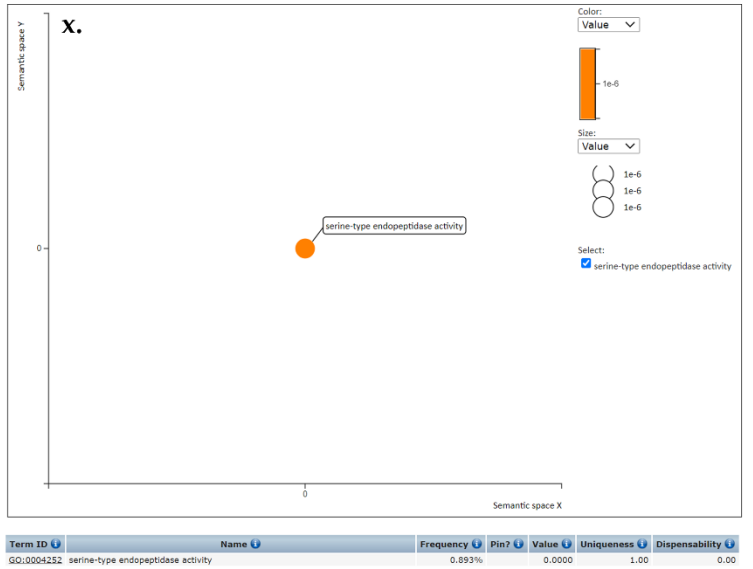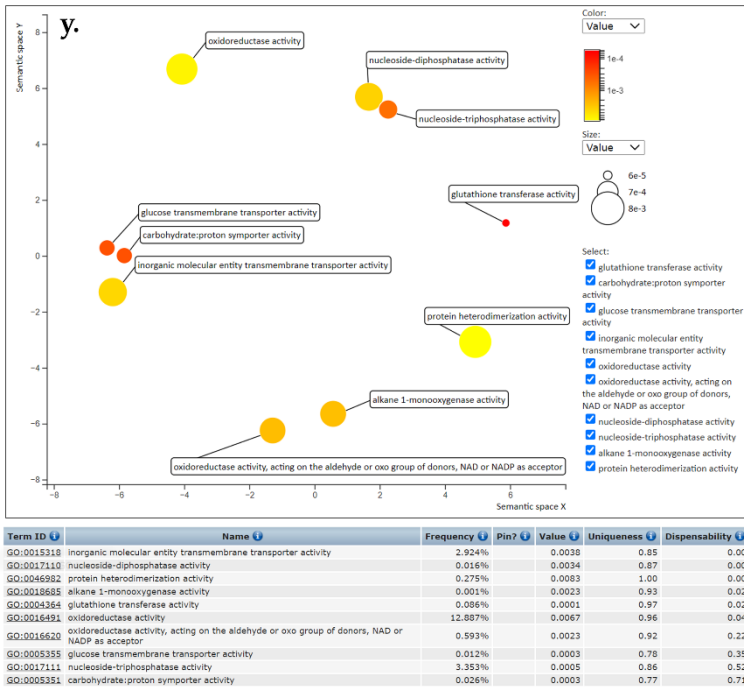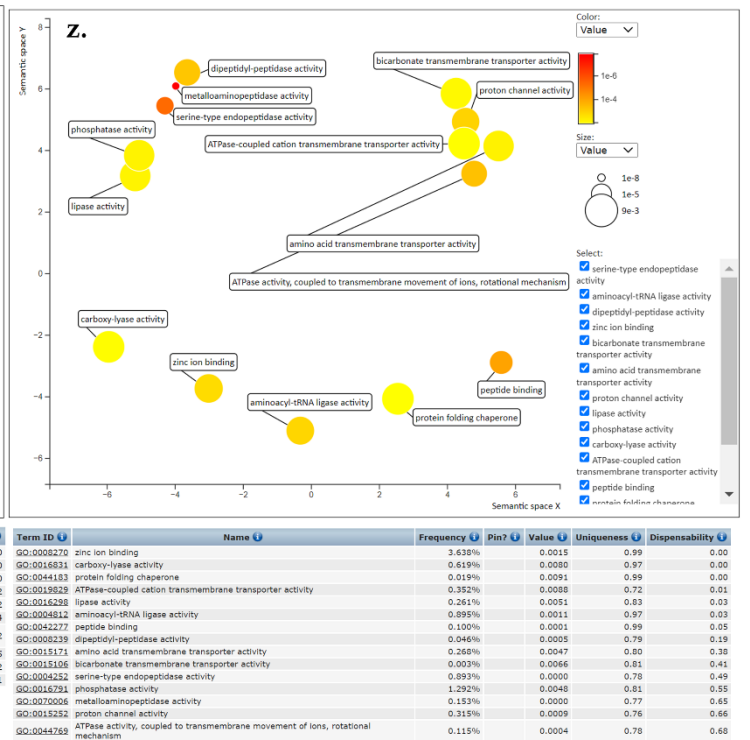

**Fig. S6: Revigo Scatter and Table Views of the GO terms over-represented in all comparisons (R vs S, R vs C and C vs S) for data from Nigeria, Niger, Chad and Cameroon.**

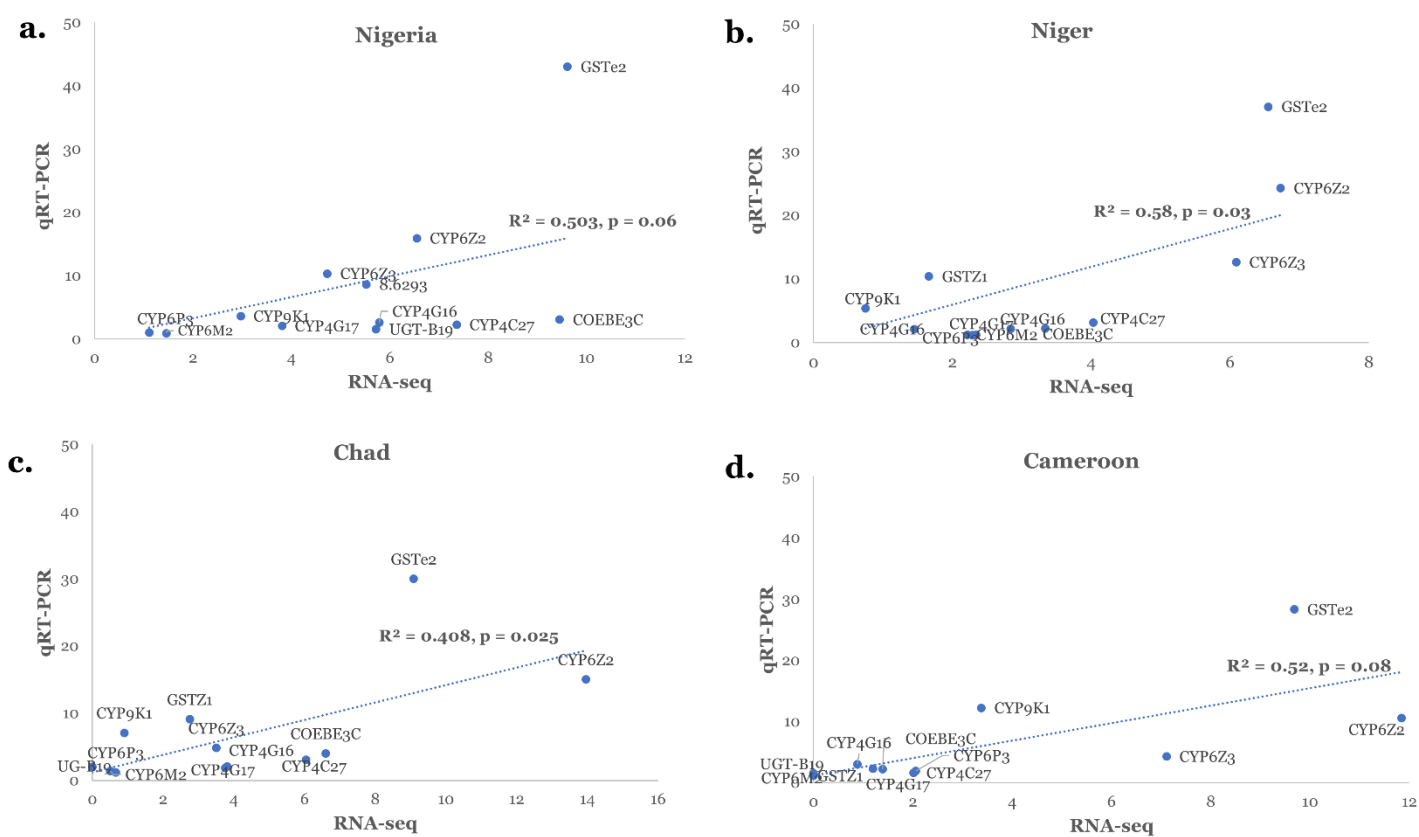

**Fig. S7: Validation of RNA-seq results using qRT-PCR:** correlation between RNA-seq fold changes and those obtained from qRT-PCR for 12 metabolic resistance genes.



**a.**

| Population | n  | S  | Syn | Nonsyn | h  | H <sub>d</sub> | π (k)   | D<br>(Tajima)        | D*<br>(Fu and Li)    |
|------------|----|----|-----|--------|----|----------------|---------|----------------------|----------------------|
| Nigeria    | 4  | 2  | 2   | 0      | 2  | 0.667          | 0.00090 | 1.893 <sup>ns</sup>  | 1.893 <sup>ns</sup>  |
| Niger      | 4  | 42 | 36  | 6      | 3  | 0.833          | 0.01848 | 2.006 <sup>ns</sup>  | 2.006 <sup>ns</sup>  |
| Chad       | 4  | 0  | 0   | 0      | 1  | 0.00           | 0.0000  | 0.000                | 0.000                |
| Cameroon   | 4  | 23 | 20  | 3      | 2  | 0.500          | 0.0078  | -0.857 <sup>ns</sup> | 0.857 <sup>ns</sup>  |
| Ngoussou   | 4  | 1  | 1   | 0      | 2  | 0.500          | 0.00034 | -0.612 <sup>ns</sup> | -0.612 <sup>ns</sup> |
| All        | 20 | 75 | 65  | 12     | 10 | 0.921          | 0.01648 | 0.501 <sup>ns</sup>  | 1.298 <sup>ns</sup>  |

**b.**

| Hap #   | Freq. | Sequences                        |
|---------|-------|----------------------------------|
| Hap_1:  | 2     | >Nigeria2 >Nigeria3              |
| Hap_2:  | 2     | >Nigeria1 >Nigeria7              |
| Hap_3:  | 1     | >Niger1                          |
| Hap_4:  | 1     | >Niger2                          |
| Hap_5:  | 2     | >Niger3 >Niger4                  |
| Hap_6:  | 4     | >Chad1 >Chad2 >Chad3 >Chad6      |
| Hap_7:  | 3     | >Cameroon1 >Cameroon2 >Cameroon3 |
| Hap_8:  | 1     | >Cameroon4                       |
| Hap_9:  | 3     | >Ngoussou2 >Ngoussou4 >Ngoussou6 |
| Hap_10: | 1     | >Ngoussou3                       |

**c.**

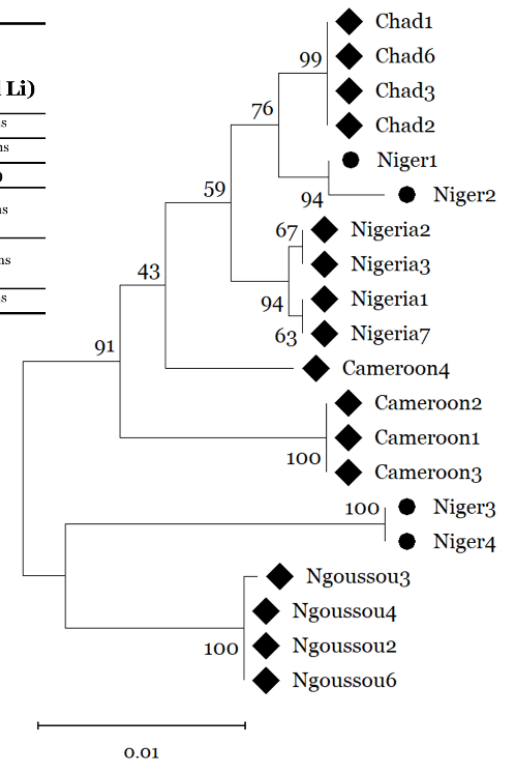

**Fig. S8: Polymorphism analysis of full length cDNA of CYP6Z2.** **a.** Summary statistics for polymorphisms of *CYP6Z2* cDNA across the Sahel countries. n = number of sequences (n); S, number of polymorphic sites; h, haplotype; H<sub>d</sub>, haplotype diversity Syn, Synonymous mutations; Nonsyn, Non-synonymous mutations; π, nucleotide diversity (k= mean number of nucleotide differences); Tajima's D and Fu and Li's D statistics, ns, not significant. **b.** *CYP6Z2* cDNA haplotypes and its frequencies, **c.** a maximum likelihood phylogenetic tree of *CYP6Z2* cDNA sequences.

|             |              |            |            |             |            |             |            |                |         |          |           |
|-------------|--------------|------------|------------|-------------|------------|-------------|------------|----------------|---------|----------|-----------|
|             |              |            |            | 20          | c-myb      |             | 40         |                | 60      | δEF1     |           |
| >NigeriaAL1 | CAGGTTCA     | AG         | CTATTCG    | CGG         | TAGTTAACTA | GTCAAATAAA  | GTGTAG     | AATT           | TAAAG   | CACCC    | 60        |
| >NigerAL1   | CAGGTTCA     | AG         | CTATTCG    | CGG         | TAGTTAACTA | GTCAAATAAA  | GTGTAG     | AATT           | TAAAG   | CACCT    | 60        |
| >NigeriaDE1 | CAGGTTCA     | TG         | CTATTCG    | CGG         | TGTTTAACTA | GTCAAATAAA  | GTGTAG     | GATT           | TAAAG   | CACCT    | 60        |
| >Ngoussou1  | CAGGTTCA     | TG         | CTATTCG    | CGG         | TGTTTAACTA | GTCAAATAAA  | GTGTAG     | GATT           | TAAAG   | CACCT    | 60        |
|             | -----        |            |            |             |            |             |            |                |         |          |           |
|             | NMP4         |            |            | 80          | FOX L1     |             | 100        |                | 120     |          |           |
| >NigeriaAL1 | AGT          | AACGT      | AT         | TTCT        | TGTGCA     | TAAAAAAACAG | GAATTCGCTT | CTGCTTTTAT     | GT      | ACG      | AAGTA 120 |
| >NigerAL1   | AGT          | AACGT      | TTT        | TTCT        | TGTGCA     | TAAAAAAACAG | GAATTCGCTT | CTGCTTTTAT     | GT      | -TGCAGTA | 119       |
| >NigeriaDE1 | AGT          | AACGT      | TTT        | TTCT        | TGTGCA     | TAAAAAAACAG | GAATTCGCTT | CTGCTTTTAT     | GT      | -TGCAGTA | 119       |
| >Ngoussou1  | AGT          | AACGT      | TTT        | TTCT        | TGTGCA     | TAAAAAAACAG | GAATTCGCTT | CTGCTTTTAT     | GT      | -TGCAGTA | 119       |
|             | -----        |            |            |             |            |             |            |                |         |          |           |
|             | C-EST/GrH-TF |            |            | 140         |            |             | 160        | AhR1           | NMP4    |          | 180       |
| >NigeriaAL1 | CGA          | AGAACCG    | GAATGAGTAT | GAAATAAAATT | CGCCGACACG | CACACAA     | CAA        | CACC           | AAACCCC | 180      |           |
| >NigerAL1   | CGA          | AGAACCG    | GAATGAGTAT | GAAATAAAATT | CGCCGACACG | CACACAAAAA  | CACC       | AAACCCC        | 179     |          |           |
| >NigeriaDE1 | CGA          | AGAACCG    | GAATGAGTAT | GAAATAAAATT | CGCCGACACG | CACACAAAAA  | CACC       | AAACCCC        | 179     |          |           |
| >Ngoussou1  | CGA          | AGAACCG    | GAATGAGTAT | GAAATAAAATT | CGCCGACACG | CACACAAAAA  | CACC       | AAACCCC        | 179     |          |           |
|             | -----        |            |            |             |            |             |            |                |         |          |           |
|             | GATA         |            |            | 200         | NF-κB      |             | 220        |                | 240     | GC Box1  |           |
| >NigeriaAL1 | AAGTAATGCT   | TTATCTCGGG | CCCTTCCAAC | GAA         | CACA       | GTC         | ACACATCC   | AA             | AGCAT   | GGGGC    | 240       |
| >NigerAL1   | AAGTAATGCT   | TTATCTCGGG | CCCTTCCAAC | GAATACAATC  | ACACATCCGA | AGCAT       | GGGGC      | 239            |         |          |           |
| >NigeriaDE1 | AAGTAATGCT   | TTATCTCGGG | CCCTTCCAAC | GAATACAATC  | ACACATCCGA | AGCAT       | GGGGC      | 239            |         |          |           |
| >Ngoussou1  | AAGTAATGCT   | TTATCTCGGG | CCCTTCCAAC | GAATACAATC  | ACACATCCGA | AGCAT       | GGGGC      | 239            |         |          |           |
|             | -----        |            |            |             |            |             |            |                |         |          |           |
|             | AREB         |            |            | 260         |            | 280         | CAAT Box   | Initiator, Inr |         | 300      |           |
| >NigeriaAL1 | GTTTGCTATG   | CTTGGGGTCG | ATGCTACAAA | CATCCACAGC  | CAATCA     | TCAG        | TT         | GGGTGTG        | 300     |          |           |
| >NigerAL1   | GTTTGCTATG   | CTTGGGGTCG | ATGCTACAAA | CATCCACAGC  | CAATCA     | TCAG        | TT         | CGGGTGTG       | 299     |          |           |
| >NigeriaDE1 | GTTTGCTATG   | CTTGGGGTCG | ATGCTACAAA | CATCCACAGC  | CAATCA     | TCAG        | TT         | CGGGTGTG       | 299     |          |           |
| >Ngoussou1  | GTTTGCTATG   | CTTGGGGTCG | ATGCTACAAA | CATCCACAGC  | CAATCA     | TCAG        | TT         | CGGGTGTG       | 299     |          |           |
|             | -----        |            |            |             |            |             |            |                |         |          |           |
|             | TSS          |            |            | 320         |            | 340         |            |                |         |          |           |
| >NigeriaAL1 | TCTCTTGAAC   | GTGTACGGTG | TGTGTCCATC | CA          | TTTTTTAG   | TTCGCTGCGA  | AA         | 352            |         |          |           |
| >NigerAL1   | TCTCTTGAAC   | GTGTACGGTG | TGTGTCCATC | CAGTTTTT    | TTAG       | TTCGCTGCGA  | AA         | 351            |         |          |           |
| >NigeriaDE1 | TCTCTTGAAC   | GTGTACGGTG | TGTGTCCATC | CAGTTTTT    | TTAG       | TTCGCTGCGA  | AA         | 351            |         |          |           |
| >Ngoussou1  | TCTCTTGAAC   | GTGTACGGTG | TGTGTCCATC | CAGTTTTT    | TTAG       | TTCGCTGCGA  | AA         | 351            |         |          |           |

**Fig. S9: Comparative alignment of the *GSTe2* 5'-UTR fragments from the various haplotypes, showing putative transcription factors binding sites (blue boxes), and polymorphic positions (in red and highlighted in pink). The arthropod Inr consensus sequence is in green box, the transcription start site indicated with red arrow, and the 3'-UTR of *GSTe1* and 5'-UTR of *GSTe2* indicated with dashed lines.**

a.

Hap# Freq. Sequences

Hap\_1: 75 NigeriaDE1 NigeriaDE2 NigeriaDE3 NigeriaDE4 NigeriaDE11  
NigeriaDE15 NigeriaDE16 NigeriaDE20 NigeriaDE26 Ngoussou1  
Ngoussou2 Ngoussou4 Ngoussou5 Ngoussou7 Ngoussou9 Ngoussou11 Ngoussou13  
NigerDE1 NigerDE2 NigerDE3 NigerDE4 NigerDE5 NigerDE6 NigerDE7 NigerDE8  
NigerDE11 NigerDE12 ChadAL1 ChadAL3 ChadAL4 ChadAL5 ChadAL6 ChadAL7  
ChadAL9 ChadAL10 ChadDE1 ChadDE2 ChadDE3 ChadDE4 ChadDE6 ChadDE7 ChadDE9  
ChadDE11 ChadDE13 ChadDE24 CameroonAL1 CameroonAL2 CameroonAL3 CameroonAL4  
CameroonAL8 CameroonAL9 CameroonAL11 CameroonDE1 CameroonDE2 CameroonDE3  
CameroonDE4 CameroonDE14 CameroonDE12 CameroonDE11 CameroonDE8  
CameroonDE10 CameroonDE6 NigeriaAL7 NigeriaAL4 NigeriaAL8 NigeriaAL17 NigeriaAL2

Hap\_2: 1 NigeriaDE29

Hap\_3: 1 NigeriaAL3

Hap\_4: 1 NigeriaAL5

Hap\_5: 4 NigerAL1 NigerAL9 NigerAL10 NigerAL11

Hap\_6: 8 NigeriaAL1 NigeriaAL6 NigeriaAL9 ChadAL2 ChadAL3  
CameroonAL5 CameroonAL25 CameroonAL7

b. 0000001111 222223  
0246680116 11 23993  
927095246848941 33  
Hap\_1 TTGTTATTCATAGATCG  
Hap\_2 .....G.....  
Hap\_3 .....C.....  
Hap\_4 ..ACAG. CACCGA .AG.  
Hap\_5 AAA.....  
Hap\_6 AAACA. .CACCGA...GC

c.

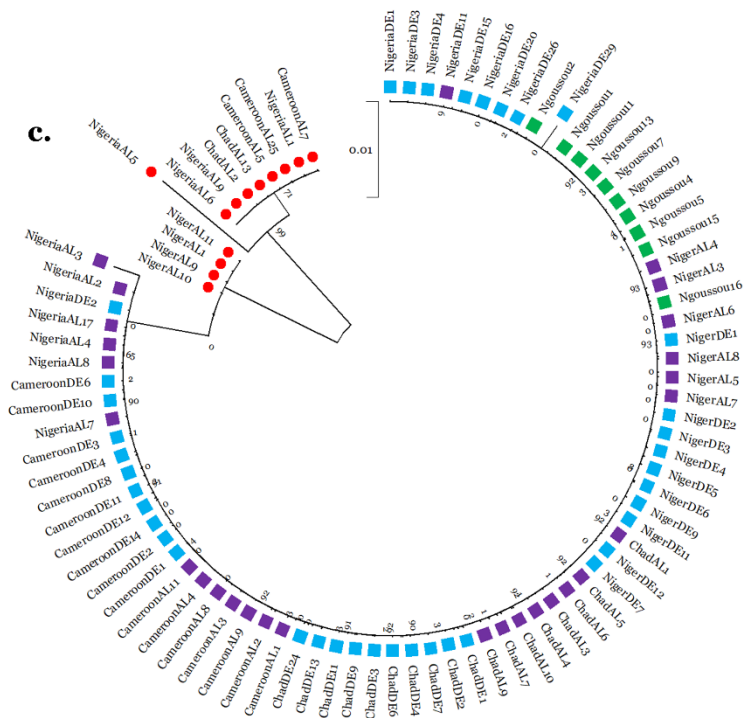

**Fig. S10: Genetic variability of the *GSTe2* 5'-UTR fragments from Nigeria, Niger, Chad, Cameroon and Ngoussou populations. a.** the six haplotypes of the 5'-UTR with respective frequencies, **b.** polymorphic positions with numbers on top indicating the nucleotide position in the 351 bp fragment, **c.** maximum likelihood phylogenetic tree of the 90 sequences, showing the DDT-alive sequences with mutations forming a clade specific to its phenotype.



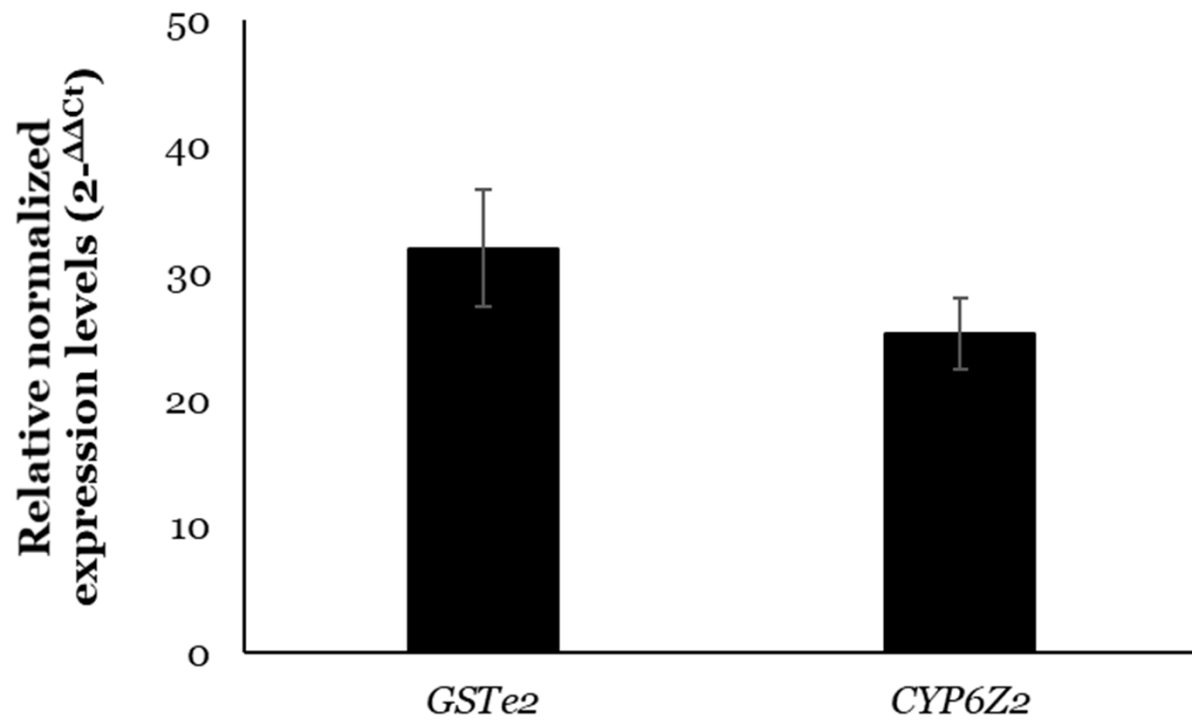

**Fig. S11: qRT-PCR validation of the overexpression of *GSTe2* and *CYP6Z2*.** The relative expression of the *GSTe2* and *CYP6Z2* in the experimental transgenic *D. melanogaster* in relation to control flies. Data shown are the mean  $\pm$  standard deviation ( $n = 6$ ).
